# Supplementary material for: RETRACTED ARTICLE: The lincRNA-ROR/miR-145 axis promotes invasion and metastasis in hepatocellular carcinoma via induction of epithelial-mesenchymal transition by targeting ZEB2
Source: PubMed Central journal article supplement (PMC5498629; doi:10.1038/s41598-017-04113-w), 2017-07-05
Supplement: 41598_2017_4113_MOESM1_ESM.pdf [file 41598_2017_4113_MOESM1_ESM.pdf]

**The lncRNA-ROR/miR-145 axis promotes invasion and metastasis in hepatocellular carcinoma via induction of epithelial-mesenchymal transition by targeting ZEB2**

Chen Li<sup>1</sup>, Lu Lu<sup>1</sup>, Bing Feng<sup>1</sup>, Kai Zhang<sup>1</sup>, Siqu Han<sup>1</sup>, Daorong Hou<sup>2</sup>, Longbang Chen<sup>1</sup>, Xiaoyuan Chu<sup>1</sup>, Rui Wang<sup>1,\*</sup>

<sup>1</sup>Department of Medical Oncology, Jinling Hospital, Medical School of Nanjing University, Nanjing 210002, Jiangsu Province, China <sup>2</sup>Animal Core Facility of Nanjing Medical University, Nanjing, Jiangsu, China

**\*Correspondence to: Rui Wang**, MD, E-mail: wangrui218@163.com No.305 Zhongshan East Road, Nanjing 210002, Jiangsu Province, China

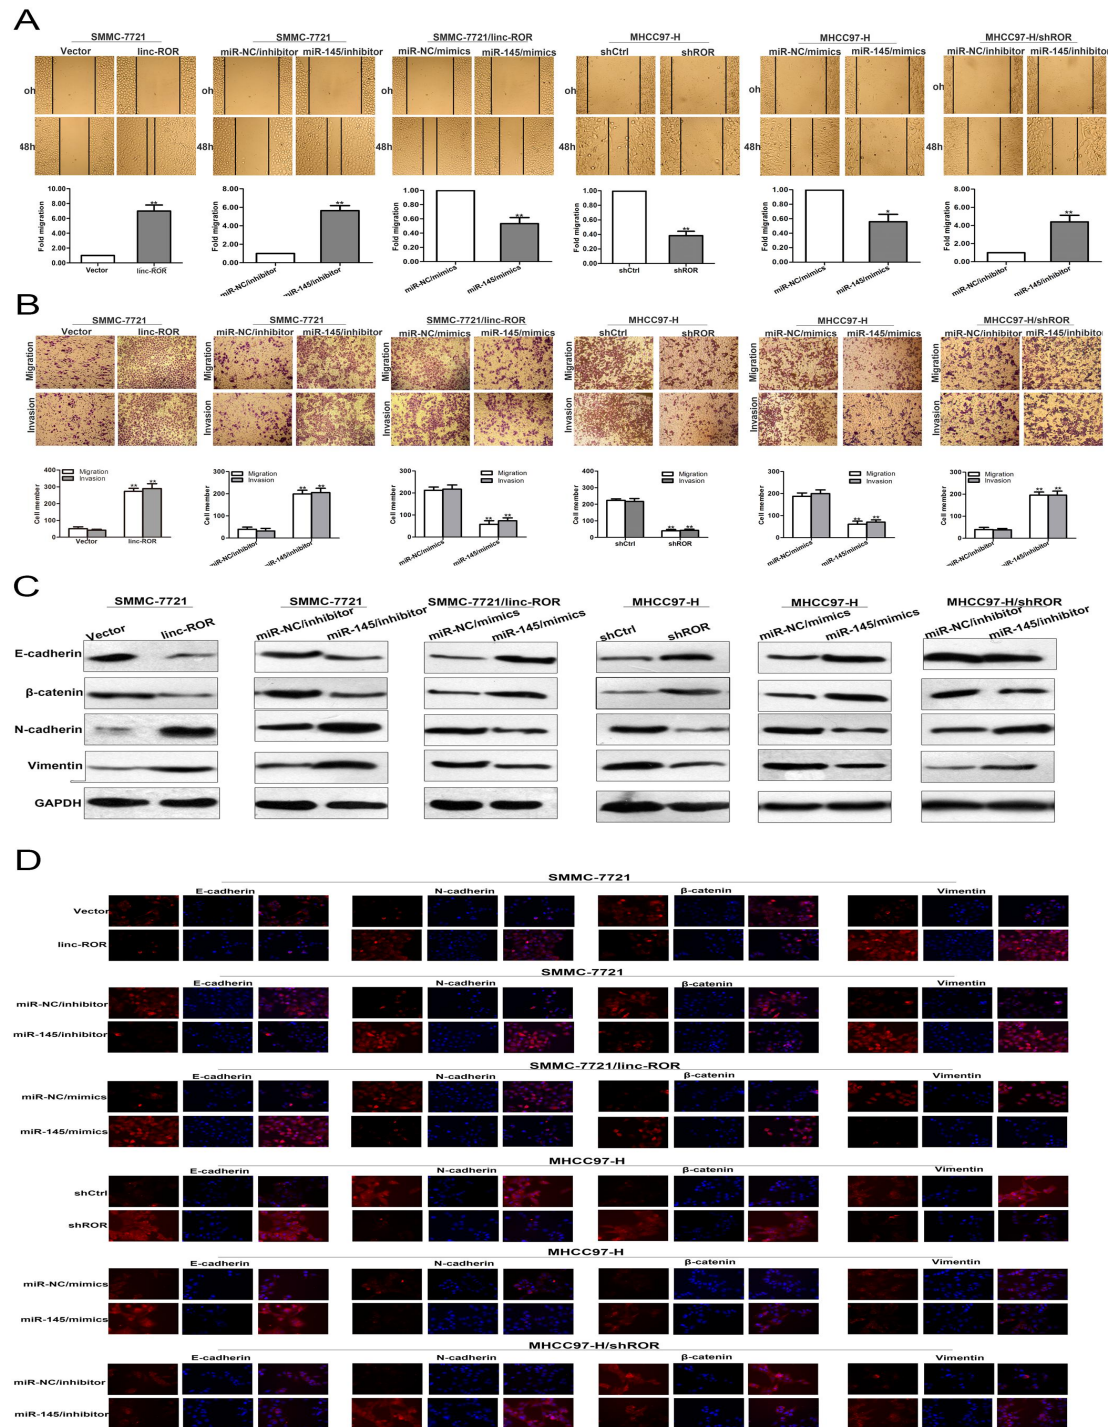

**Supplementary Figure S1.** (A) Wound healing assays, and (B) transwell assays to determine cell migration and invasion ability of (left to right) SMMC-7721 cells transfected with linc-ROR, SMMC-7721 cells transfected with miR-145/inhibitor, SMMC-7721/linc-ROR cells co-transfected with miR-145/mimics, MHCC97-H cells transfected with shROR, MHCC97-H cells transfected with miR-145/mimics, MHCC97-H/shROR cells co-transfected with miR-145/mimics. (C) Western blotting and (D) Immunofluorescence to detect EMT markers of SMMC-7721 cells transfected with linc-ROR, SMMC-7721 cells transfected with miR-145/inhibitor, SMMC-7721/linc-ROR cells co-transfected with miR-145/mimics, MHCC97-H cells

transfected with shROR, MHCC97-H cells transfected with miR-145/mimics, MHCC97-H/shROR cells co-transfected with miR-145/mimics.

**Supplemental Table S1.** Initial profiling of miRNAs in response to knockdown of linc-ROR in HCCLM3 cells compared with the control cells.

|    | miRNA           | Binding sites        | fold-change |
|----|-----------------|----------------------|-------------|
| 1  | hsa-miR-132     | 853-875              | 0.66        |
| 2  | has-miR-133     | 71-106               | 0.98        |
| 3  | hsa-miR-145-5p  | 2037-2059; 1307-1330 | 4.73        |
| 4  | hsa-miR-181a    | 1238-1259; 2518-2539 | 1.67        |
| 5  | hsa-miR-19a-5p  | 1500-1521            | 1.35        |
| 6  | hsa-miR-200b    | 725-747              | 1.69        |
| 7  | hsa-miR-205-5p  | 789-810              | 3.61        |
| 8  | hsa-miR-214     | 468-490              | 2.08        |
| 9  | hsa-miR-219-5p  | 323-345; 423-445     | 0.54        |
| 10 | hsa-miR-320c    | 614-636              | 1.12        |
| 11 | hsa-miR-34a-5p  | 749-771; 1369-1390   | 2.68        |
| 12 | hsa-miR-454     | 196-218              | 0.21        |
| 13 | hsa-miR-520c-3p | 1429-1450            | 1.24        |
| 14 | hsa-miR-99b-3p  | 365-389              | 0.13        |
| 15 | hsa-let-7a-1    | 147-167, 435-476     | 2.75        |
